# Supplementary material
Source: PubMed Central journal article supplement (PMC3856256)
Supplement: NIHMS516731-supplement-01.pdf [file NIHMS516731-supplement-01.pdf]

**Table S1** | List of sgRNA pairs used with Cas9 nickase (D10A) to identify the optimal target site spacing for double nicking across multiple genes, related to Figure 2. N.D.: Not detected. N.T.: Not tested

**Table S2** | List of sgRNAs used in this study. Related to Figure 2.

**Table S1.** List of sgRNA pairs used with Cas9 nickase (D10A) to identify the optimal target site spacing for double nicking across multiple genes, related to Figure 2. N.D.: Not detected. N.T.: Not tested

| Gene   | Overhang Length (bp) | Overhang Type | Offset Length (bp) | Left sgRNA ID | Right sgRNA ID | Cas9n with left and right sgRNA indel (%) | left sgRNA target site    |     | left sgRNA with wildtype Cas9 indel (%) | right sgRNA target site   |     | right sgRNA with wildtype Cas9 indel (%) |
|--------|----------------------|---------------|--------------------|---------------|----------------|-------------------------------------------|---------------------------|-----|-----------------------------------------|---------------------------|-----|------------------------------------------|
|        |                      |               |                    |               |                |                                           | guide sequence (5' to 3') | PAM |                                         | guide sequence (5' to 3') | PAM |                                          |
| EMX1   | 148                  | 3'            | -182               | 15            | 4              | N.D.                                      | TGGCCACCGGTTGATGTGA       | TGG | 13.15                                   | AGGCCACAGTGGCTGCTCTG      | GGG | 27.29                                    |
| EMX1   | 101                  | 3'            | -135               | 23            | 1              | N.D.                                      | ACTCTGCOCTGTTGGGTTTG      | TGG | 24.7                                    | GAGTCGAGCAGAAGAAGAA       | GGG | 21.9                                     |
| EMX1   | 48                   | 3'            | -82                | 23            | 17             | N.D.                                      | ACTCTGCOCTGTTGGGTTTG      | TGG | 24.7                                    | CACGAAGCAGGCCAATGGGG      | AGG | 13.57                                    |
| EMX1   | 25                   | 3'            | -59                | 10            | 13             | N.D.                                      | CAAACGGCAGAAGCTGGAGG      | AGG | 26.15                                   | GGGCCCTTCTTCTCTCTCT       | CGG | 33.17                                    |
| EMX1   | 15                   | 3'            | -49                | 4             | 5              | N.D.                                      | AGGCCACAGTGGCTGCTCTG      | GGG | 27.29                                   | GGGCCACAGATGAGAAACTC      | AGG | 26.56                                    |
| EMX1   | 8                    | 3'            | -42                | 7             | 9              | N.D.                                      | TGAAGTGTGTTTCCAGAAC       | CGG | 36.02                                   | GCCGTTTGTACTTTGTCTCT      | CGG | 30.49                                    |
| EMX1   | 26                   | 5'            | -8                 | 9             | 19             | 13.7 ± 1.27                               | GCCGTTTGTACTTTGTCTCT      | CGG | 9.82                                    | GGCAGAGTGTCTTGTCTGC       | TGG | 26.15                                    |
| EMX1   | 30                   | 5'            | -4                 | 9             | 10             | 19.72 ± 0.32                              | GCCGTTTGTACTTTGTCTCT      | CGG | 30.49                                   | CAAACGGCAGAAGCTGGAGG      | AGG | 22.06                                    |
| EMX1   | 31                   | 5'            | -3                 | 6             | 7              | 21.35 ± 2.23                              | TCACTGGGCCAGGGAGGGA       | GGG | 10.75                                   | TGAAGTGTGTTTCCAGAAC       | CGG | 36.02                                    |
| EMX1   | 34                   | 5'            | 0                  | 15            | 16             | 26.89 ± 1.54                              | TGGCCACCGGTTGATGTGA       | TGG | 13.15                                   | TTGCCACGAAAGCAGGCCAAT     | GGG | 13.77                                    |
| EMX1   | 38                   | 5'            | 4                  | 15            | 17             | 36.31 ± 2.97                              | TGGCCACCGGTTGATGTGA       | TGG | 14.49                                   | CACGAAGCAGGCCAATGGGG      | AGG | 13.57                                    |
| EMX1   | 51                   | 5'            | 17                 | 5             | 7              | 31.12 ± 0.25                              | GGGCCACAGATGAGAAACTC      | AGG | 26.56                                   | TGAAGTGTGTTTCCAGAAC       | CGG | 36.02                                    |
| EMX1   | 54                   | 5'            | 20                 | 5             | 8              | 32.41 ± 3.68                              | GGGCCACAGATGAGAAACTC      | AGG | 26.56                                   | AGGTGTGTTTCCAGAAGCCG      | AGG | 35.53                                    |
| EMX1   | 65                   | 5'            | 31                 | 6             | 10             | 13.45 ± 1.99                              | TCACTGGGCCAGGGAGGGA       | GGG | 10.75                                   | CAAACGGCAGAAGCTGGAGG      | AGG | 26.15                                    |
| EMX1   | 69                   | 5'            | 35                 | 6             | 11             | 12.39 ± 1.29                              | TCACTGGGCCAGGGAGGGA       | GGG | 10.75                                   | GGCAGAACCTGGAGGAGGA       | AGG | 22.06                                    |
| EMX1   | 76                   | 5'            | 42                 | 9             | 14             | 21.71 ± 1.66                              | GCCGTTTGTACTTTGTCTCT      | CGG | 30.49                                   | AGGGCTCCCATCAGATCAAC      | CGG | 41.27                                    |
| EMX1   | 85                   | 5'            | 51                 | 5             | 10             | 21.89 ± 1.88                              | GGGCCACAGATGAGAAACTC      | AGG | 26.56                                   | CAAACGGCAGAAGCTGGAGG      | AGG | 26.15                                    |
| EMX1   | 95                   | 5'            | 61                 | 6             | 12             | 5.88 ± 1.81                               | TCACTGGGCCAGGGAGGGA       | GGG | 10.75                                   | TGAGTCGAGCAGAAGAAGA       | AGG | 29.06                                    |
| EMX1   | 135                  | 5'            | 101                | 5             | 14             | 15.78 ± 2.19                              | GGGCCACAGATGAGAAACTC      | AGG | 26.56                                   | AGGGCTCCCATCAGATCAAC      | CGG | 41.27                                    |
| EMX1   | 145                  | 5'            | 111                | 6             | 16             | N.D.                                      | TCACTGGGCCAGGGAGGGA       | GGG | 10.75                                   | TTGCCACGAAAGCAGGCCAAT     | GGG | 13.77                                    |
| EMX1   | 181                  | 5'            | 147                | 6             | 18             | N.D.                                      | TCACTGGGCCAGGGAGGGA       | GGG | 10.75                                   | TCACTCCAATGACTAGGGT       | GGG | 25.14                                    |
| EMX1   | 201                  | 5'            | 167                | 5             | 18             | N.D.                                      | GGGCCACAGATGAGAAACTC      | AGG | 26.56                                   | TCACTCCAATGACTAGGGT       | GGG | 25.14                                    |
| EMX1   | 222                  | 5'            | 188                | 6             | 19             | N.D.                                      | TCACTGGGCCAGGGAGGGA       | GGG | 10.75                                   | GGCAGAGTGTCTTGTCTGC       | TGG | 10.75                                    |
| EMX1   | 242                  | 5'            | 208                | 5             | 19             | N.D.                                      | GGGCCACAGATGAGAAACTC      | AGG | 26.56                                   | GGCAGAGTGTCTTGTCTGC       | TGG | 17.22                                    |
| DYRK1A | 164                  | 3'            | -198               | 34            | 47             | N.D.                                      | ATCTGGTCAGAATATGATAA      | AGG | 10.65 ± 2.05                            | AAOCTCACTTATCTTCTTGT      | AGG | 19.02 ± 4.32                             |
| DYRK1A | 105                  | 3'            | -139               | 35            | 47             | N.D.                                      | GTCACGTGACTGATGTGAAT      | TGG | 16.71 ± 2.47                            | AAOCTCACTTATCTTCTTGT      | AGG | 17.04 ± 1.30                             |
| DYRK1A | 66                   | 3'            | -100               | 36            | 48             | N.D.                                      | CATCTGAAGGCCAGCAGCAT      | TGG | 8.82 ± 1.01                             | CTCACTTATCTTCTTGTAGG      | AGG | 18.79 ± 2.71                             |
| DYRK1A | 25                   | 3'            | -59                | 35            | 49             | N.D.                                      | GTCACGTGACTGATGTGAAT      | TGG | 17.83 ± 0.43                            | CCATGCTGCTGGCCTTCAGA      | TGG | 17.15 ± 3.29                             |
| DYRK1A | 4                    | 3'            | -38                | 37            | 31             | N.D.                                      | TGATAAGGCAGAAOCTGTT       | TGG | 4.95 ± 0.66                             | GCCAAACATAAGTGAOCCAC      | AGG | 16.38 ± 3.39                             |
| DYRK1A | 17                   | 5'            | -17                | 38            | 47             | N.D.                                      | GAAGATAAGTGAAGTTTAAA      | AGG | 5.30 ± 1.98                             | AAOCTCACTTATCTTCTTGT      | AGG | 24.18 ± 3.22                             |
| DYRK1A | 21                   | 5'            | -13                | 39            | 33             | 10.54 ± 0.63                              | GTATCATTGACATATCTAA       | TGG | 26.90 ± 1.17                            | TGTCAAATGATACAAACATT      | AGG | 29.69 ± 0.86                             |
| DYRK1A | 25                   | 5'            | -9                 | 40            | 49             | 2.33 ± 0.11                               | CAGCATGGAATGAAATGAC       | CGG | 3.33 ± 0.56                             | CCATGCTGCTGGCCTTCAGA      | TGG | 20.43 ± 2.40                             |
| DYRK1A | 29                   | 5'            | -5                 | 41            | 50             | 27.76 ± 0.84                              | GCAGCATGGAATGAAATGA       | CGG | 17.84 ± 5.46                            | GCTGCTGGCCTTCAGATGGC      | TGG | 21.92 ± 3.46                             |
| DYRK1A | 33                   | 5'            | -1                 | 34            | 51             | 10.42 ± 0.90                              | ATCTGGTCAGAATATGATAA      | AGG | 9.13 ± 2.32                             | TCAGCAACCTCAACTAACCC      | AGG | 24.14 ± 2.95                             |
| DYRK1A | 35                   | 5'            | 1                  | 42            | 52             | 7.63 ± 0.51                               | GTGCAAGCCGACAGATGAA       | AGG | 6.65 ± 2.19                             | TCATTTTCATTCCATGCTGC      | TGG | 20.61 ± 3.64                             |
| DYRK1A | 36                   | 5'            | 2                  | 28            | 29             | 38.46 ± 0.74                              | GGAGTATCAGAAATGACTAT      | TGG | 20.88 ± 9.09                            | GGAGTATCAGAAATGACTAT      | TGG | 30.3 ± 0.7                               |
| DYRK1A | 41                   | 5'            | 7                  | 30            | 31             | 34.41 ± 0.87                              | GGTCACTGTACTGATGTGAA      | TGG | 25.68 ± 5.95                            | GCCAAACATAAGTGAOCCAC      | AGG | 33.1 ± 0.4                               |
| DYRK1A | 42                   | 5'            | 8                  | 43            | 31             | 38.36 ± 0.32                              | TCACTGTACTGATGTGAATG      | GGG | 24.68 ± 4.58                            | GCCAAACATAAGTGAOCCAC      | AGG | 29.46 ± 3.30                             |
| DYRK1A | 43                   | 5'            | 9                  | 32            | 33             | 28.97 ± 0.32                              | GTCTTAAATAAGAAGTTT        | AGG | 23.60 ± 2.56                            | TGTCAAATGATACAAACATT      | AGG | 22.4 ± 1.6                               |
| DYRK1A | 46                   | 5'            | 12                 | 44            | 53             | 11.90 ± 1.65                              | TCCTACAAGAAGATAAGTGA      | AGG | 6.57 ± 1.36                             | CATGCAAAOCTTCATCTGTT      | CGG | 30.42 ± 1.14                             |
| DYRK1A | 77                   | 5'            | 43                 | 36            | 31             | 6.63 ± 0.27                               | COCTGAAAGGCCAGCAGCAT      | TGG | 10.02 ± 1.17                            | GCCAAACATAAGTGAOCCAC      | AGG | 22.92 ± 5.16                             |
| DYRK1A | 86                   | 5'            | 52                 | 38            | 52             | N.D.                                      | GAAGATAAGTGAAGTTTAAA      | AGG | 2.90 ± 0.82                             | TCATTTTCATTCCATGCTGC      | TGG | 17.30 ± 1.62                             |
| DYRK1A | 97                   | 5'            | 63                 | 38            | 49             | N.D.                                      | GAAGATAAGTGAAGTTTAAA      | AGG | 2.16 ± 0.48                             | CCATGCTGCTGGCCTTCAGA      | TGG | 24.75 ± 2.50                             |
| DYRK1A | 131                  | 5'            | 97                 | 45            | 52             | N.D.                                      | TATCATTGACATATCTAAT       | TGG | 8.21 ± 2.83                             | TCATTTTCATTCCATGCTGC      | TGG | 14.61 ± 4.10                             |
| DYRK1A | 155                  | 5'            | 121                | 44            | 31             | N.D.                                      | TCCTACAAGAAGATAAGTGA      | AGG | 9.99 ± 4.12                             | GCCAAACATAAGTGAOCCAC      | AGG | 19.74 ± 2.91                             |
| DYRK1A | 191                  | 5'            | 157                | 46            | 52             | N.D.                                      | AACTTTTCTAACTACAAACA      | AGG | 5.74 ± 2.24                             | TCATTTTCATTCCATGCTGC      | TGG | 21.37                                    |
| GRIN2B | 165                  | 3'            | -199               | 70            | 82             | N.D.                                      | CCAAACCAACCAAGACTTG       | GGG | 2.95 ± 0.21                             | CTGGTAGTGGAGTTGGGTT       | TGG | 17.25 ± 1.30                             |
| GRIN2B | 67                   | 3'            | -101               | 71            | 83             | N.D.                                      | ACAGCAATGCAATGCTGGG       | GGG | 18.00 ± 2.31                            | AGTGTGTTCTCCAAAGTTC       | TGG | 28.64 ± 0.69                             |
| GRIN2B | 42                   | 3'            | -76                | 72            | 84             | N.D.                                      | GTGAAATCATCTTTCTCGT       | TGG | 14.56 ± 7.84                            | GGCATTGCTGTCTOCTGTT       | GGG | 21.26 ± 2.68                             |
| GRIN2B | 16                   | 3'            | -50                | 73            | 85             | N.D.                                      | TCTGCTGCTGACACGGCCA       | AGG | 4.24 ± 0.79                             | TOCCAAGTTCGTGGTGGTGT      | TGG | 19.64 ± 0.23                             |
| GRIN2B | 2                    | 3'            | -36                | 74            | 86             | N.D.                                      | OGAGCTCTGCTGCTGACAC       | CGG | 2.99 ± 0.31                             | TTGGCCGCTGCTGGCCTGTC      | AGG | 4.74 ± 0.15                              |
| GRIN2B | 9                    | 5'            | -25                | 75            | 87             | 1.04 ± 0.53                               | TCCTTGATGGCCACTGCTG       | CGG | 2.25 ± 1.08                             | TTCCGACGAGGTGGCCATCA      | AGG | 17.13 ± 2.90                             |
| GRIN2B | 18                   | 5'            | -16                | 76            | 88             | 5.93 ± 1.25                               | ATGACAGCAATGCCAATGCT      | TGG | 16.46 ± 2.28                            | TGGCATTGCTGTCTOCTG        | TGG | 16.35 ± 1.25                             |
| GRIN2B | 23                   | 5'            | -11                | 77            | 88             | 2.28 ± 0.34                               | AGCAATGCCAATGCTGGGG       | GGG | 3.19 ± 0.51                             | TGGCATTGCTGTCTOCTG        | TGG | 15.17 ± 2.02                             |
| GRIN2B | 28                   | 5'            | -6                 | 78            | 86             | 1.45 ± 0.12                               | GCCAAACCAACCAAGACTT       | TGG | 17.80 ± 2.30                            | TTGGCCGCTGCTGGCCTGTC      | AGG | 4.46 ± 1.35                              |
| GRIN2B | 30                   | 5'            | -4                 | 69            | 85             | 11.80 ± 0.29                              | GGAGAACGCACTCOGCTCT       | TGG | 21.80 ± 1.40                            | TOCCAAGTTCGTGGTGGTGT      | TGG | 21.33 ± 0.63                             |
| GRIN2B | 33                   | 5'            | -1                 | 76            | 65             | 24.24 ± 0.23                              | ATGACAGCAATGCCAATGCT      | TGG | 19.48 ± 1.88                            | OCTGCTGGCCTTCCGAGC        | AGG | 21.19 ± 3.42                             |
| GRIN2B | 34                   | 5'            | 0                  | 79            | 65             | 20.83 ± 0.95                              | TGACAGCAATGCCAATGCTG      | GGG | 21.44 ± 3.02                            | OCTGCTGGCCTTCCGAGC        | AGG | 24.11 ± 0.14                             |
| GRIN2B | 36                   | 5'            | 2                  | 58            | 59             | 31.76 ± 1.00                              | COGGCCAAAGAOCTTGAAGCC     | AGG | 32.50 ± 0.50                            | CTGGTTGTAGGATTTGAGTT      | AGG | 26.7 ± 2.9                               |
| GRIN2B | 38                   | 5'            | 4                  | 54            | 55             | 34.45 ± 0.45                              | TATTACAGAAATGAGACTG       | TGG | 30.90 ± 1.40                            | TTATTTCTGAAGAATATTAA      | AGG | 27.6 ± 2.5                               |
| GRIN2B | 38                   | 5'            | 4                  | 56            | 57             | 44.22 ± 0.55                              | AAAAGAOCTAAACAAAAGAA      | TGG | 23.20 ± 2.10                            | TGTGTGAGGATAAAGAGATT      | GGG | 29.4 ± 2.7                               |
| GRIN2B | 38                   | 5'            | 4                  | 77            | 65             | 9.60 ± 0.25                               | AGCAATGCCAATGCTGGGG       | GGG | 4.19 ± 0.58                             | OCTGCTGGCCTTCCGAGC        | AGG | 21.78 ± 1.70                             |
| GRIN2B | 40                   | 5'            | 6                  | 60            | 61             | 42.54 ± 1.39                              | TCAGAGCTTCTGACAOCCA       | TGG | 14.20 ± 1.50                            | AATACCTAGTTACAGGCATT      | TGG | 24.8 ± 1.0                               |
| GRIN2B | 45                   | 5'            | 11                 | 76            | 87             | 18.96 ± 0.93                              | ATGACAGCAATGCCAATGCT      | TGG | 20.45 ± 0.98                            | TTCCGACGAGGTGGCCATCA      | AGG | 13.21 ± 0.74                             |
| GRIN2B | 50                   | 5'            | 16                 | 77            | 87             | 5.33 ± 0.57                               | AGCAATGCCAATGCTGGGG       | GGG | 4.93 ± 2.06                             | TTCCGACGAGGTGGCCATCA      | AGG | 12.51 ± 1.21                             |
| GRIN2B | 89                   | 5'            | 55                 | 80            | 89             | 7.31 ± 0.83                               | GAGAAGCACTCOGCTCTG        | GGG | 3.09 ± 0.54                             | CAGAAGAGGCCCCCAGCAT       | TGG | 25.02 ± 1.86                             |
| GRIN2B | 105                  | 5'            | 71                 | 78            | 90             | 10.56 ± 1.21                              | GCCAAACCAACCAAGACTT       | TGG | 25.29 ± 1.65                            | CGTGGCCTTCCGAGCAGG        | TGG | 23.32 ± 0.78                             |
| GRIN2B | 132                  | 5'            | 98                 | 81            | 67             | 2.66 ± 0.89                               | CTGCTGACACGGCCAGGAC       | CGG | 4.34 ± 0.62                             | TGATTTCCACCATCTCTCG       | TGG | 20.95 ± 0.79                             |
| GRIN2B | 175                  | 5'            | 141                | 80            | 67             | N.D.                                      | GAGAAGCACTCOGCTCTG        | GGG | 2.96 ± 0.93                             | TGATTTCCACCATCTCTCG       | TGG | 19.77 ± 2.20                             |
| GRIN2B | 231                  | 5'            | 197                | 81            | 91             | N.D.                                      | CTGCTGACACGGCCAGGAC       | CGG | 6.17 ± 2.09                             | TGACCGAAGATCCAGGGGG       | TGG | 23.36 ± 2.34                             |
| MeCP2  | 38                   | 5'            | 4                  | 92            | 93             | 12.16 ± 2.58                              | GTCCAACCTTCAGGCAAGGT      | GGG | 24.11 ± 3.48                            | AAGCTTAAACAAAGGAAGTC      | TGG | 35.76 ± 2.65                             |
| MeCP2  | 34                   | 5'            | 0                  | 94            | 95             | 11.72 ± 2.40                              | GCGCTGTTTGGGGAAAGCCG      | AGG | N.T                                     | GGCTCCATTATCCGTGACCG      | GGG | N.T                                      |
| VEGFA  | 50                   | 5'            | 16                 | 96            | 97             | 23.92 ± 0.54                              | GGGTGGGGGAGTTTCTCTC       | TGG | 14.15 ± 1.07                            | TCCTCTTTAGCCAGAGCCG       | GGG | 33.59 ± 0.88                             |
| VEGFA  | 54                   | 5'            | 20                 | 98            | 99             | 16.32 ± 1.01                              | GACCCCTCCACCCCGCCTC       | CGG | 24.52 ± 1.80                            | GAACTTTTTCGTCCAACTTC      | TGG | 10.45 ± 1.14                             |

**Table S2.** List of sgRNAs used in this study. Related to Figure 2.

| gene   | sgRNA ID | guide sequence (5' to 3')       | PAM | strand | species            |
|--------|----------|---------------------------------|-----|--------|--------------------|
| EMX1   | 1        | GAGTCCGAGCAGAAGAAGAA            | GGG | +      | <i>H. sapiens</i>  |
| EMX1   | 2        | GGAAAGGCOCTGAGTCCGAGCCAGAAGAAGA | GGG | +      | <i>H. sapiens</i>  |
| EMX1   | 3        | GGCOCTCAAGGAGTCCGAGCAGAAGAAGA   | GGG | +      | <i>H. sapiens</i>  |
| EMX1   | 4        | AGGCOCCAGTGGCTGCTCTG            | GGG | +      | <i>H. sapiens</i>  |
| EMX1   | 5        | GGGGCACAGATGAGAACTC             | AGG | -      | <i>H. sapiens</i>  |
| EMX1   | 6        | TCACTGGGCCAGGAGGGA              | GGG | -      | <i>H. sapiens</i>  |
| EMX1   | 7        | TGAAGGTGTGTTCCAGAAC             | CGG | +      | <i>H. sapiens</i>  |
| EMX1   | 8        | AGGTGTGTTCCAGAACCGG             | AGG | +      | <i>H. sapiens</i>  |
| EMX1   | 9        | GCOGTTTGTACTTTGCTCTC            | CGG | -      | <i>H. sapiens</i>  |
| EMX1   | 10       | CAAAACGGCAGAAGCTGGAAGG          | AGG | +      | <i>H. sapiens</i>  |
| EMX1   | 11       | CGGCAGAAGCTGAGGAGGA             | AGG | +      | <i>H. sapiens</i>  |
| EMX1   | 12       | TGAGTCCGAGCAGAAGAAGA            | AGG | +      | <i>H. sapiens</i>  |
| EMX1   | 13       | GGAGCOCTTCTTCTCTGCT             | CGG | -      | <i>H. sapiens</i>  |
| EMX1   | 14       | AGGGCTOCCATCACATCAAC            | CGG | +      | <i>H. sapiens</i>  |
| EMX1   | 15       | TGGCCACCGGTTGATGTGA             | TGG | -      | <i>H. sapiens</i>  |
| EMX1   | 16       | TTGCCACGAGCAGCCCAAT             | GGG | +      | <i>H. sapiens</i>  |
| EMX1   | 17       | CACGAAACGAGCCCAATGGGG           | AGG | +      | <i>H. sapiens</i>  |
| EMX1   | 18       | TCACTCCAATGACTAGGGT             | GGG | +      | <i>H. sapiens</i>  |
| EMX1   | 19       | GGCAGAGTGTCTCTCTGCT             | TGG | +      | <i>H. sapiens</i>  |
| EMX1   | 20       | GACATCGATGCTCTCCCAT             | TGG | -      | <i>H. sapiens</i>  |
| EMX1   | 21       | GTCACCTCCAATGACTAGGG            | TGG | +      | <i>H. sapiens</i>  |
| EMX1   | 22       | GGGCAACCCACAACCCACGA            | GGG | +      | <i>H. sapiens</i>  |
| EMX1   | 23       | ACTCTGCOCTGTGGGTTTG             | TGG | -      | <i>H. sapiens</i>  |
| EMX1   | 24       | CAAGCAGCACTCTGCOCTCG            | TGG | -      | <i>H. sapiens</i>  |
| EMX1   | 25       | TTCTTCTTCTGCTGGACTC             | AGG | -      | <i>H. sapiens</i>  |
| EMX1   | 26       | CTCOCCATTGGCTGCTCG              | AGG | -      | <i>H. sapiens</i>  |
| EMX1   | 27       | GTCACCTCCAATGACTAGGG            | TGG | +      | <i>H. sapiens</i>  |
| DYRK1A | 28       | GAACCTAOCCTGGTTAGTTAG           | AGG | -      | <i>H. sapiens</i>  |
| DYRK1A | 29       | GGAGTATCAGAAATGACTAT            | TGG | +      | <i>H. sapiens</i>  |
| DYRK1A | 30       | GGTCACTGTACTGATGTGAA            | TGG | -      | <i>H. sapiens</i>  |
| DYRK1A | 31       | GCCAAACATAAGTGAACCAAC           | AGG | +      | <i>H. sapiens</i>  |
| DYRK1A | 32       | GTTCTTAAATAAGAACTTT             | AGG | -      | <i>H. sapiens</i>  |
| DYRK1A | 33       | TGTCAAATGATACAAACATT            | AGG | +      | <i>H. sapiens</i>  |
| DYRK1A | 34       | ATCTGGTCAGAATATGATAA            | AGG | -      | <i>H. sapiens</i>  |
| DYRK1A | 35       | GTCACCTGTACTGATGTGAAT           | TGG | -      | <i>H. sapiens</i>  |
| DYRK1A | 36       | CATCTGAAGGCCAGCAGCAT            | TGG | -      | <i>H. sapiens</i>  |
| DYRK1A | 37       | TGATAAGGCAGAAACCTGTT            | TGG | -      | <i>H. sapiens</i>  |
| DYRK1A | 38       | GAAGATAAGTGAAGTTAAA             | AGG | -      | <i>H. sapiens</i>  |
| DYRK1A | 39       | GTATCATTGACATATCTAA             | TGG | -      | <i>H. sapiens</i>  |
| DYRK1A | 40       | CAGCATGGAATGAAAATGAC            | CGG | -      | <i>H. sapiens</i>  |
| DYRK1A | 41       | GCAGCATGGAATGAAAATGA            | CGG | -      | <i>H. sapiens</i>  |
| DYRK1A | 42       | GTGCAAGCCGACAGATGAA             | AGG | -      | <i>H. sapiens</i>  |
| DYRK1A | 43       | TCACTGTACTGATGTGAATG            | GGG | -      | <i>H. sapiens</i>  |
| DYRK1A | 44       | TOCTACAAGAAGATAAGTGA            | AGG | -      | <i>H. sapiens</i>  |
| DYRK1A | 45       | TATCATTGACATATCTAAT             | TGG | -      | <i>H. sapiens</i>  |
| DYRK1A | 46       | AACTTTTCTAACTACAAACA            | AGG | -      | <i>H. sapiens</i>  |
| DYRK1A | 47       | AAOCTCACTTATCTTCTGT             | AGG | +      | <i>H. sapiens</i>  |
| DYRK1A | 48       | CTCACTTATCTTCTGTAGG             | AGG | +      | <i>H. sapiens</i>  |
| DYRK1A | 49       | CCATGCTGCTGGCTTCAGA             | TGG | +      | <i>H. sapiens</i>  |
| DYRK1A | 50       | GCTGCTGGCTTCAGATGGC             | TGG | +      | <i>H. sapiens</i>  |
| DYRK1A | 51       | TCAGCAOCTCTAACTAACC             | AGG | +      | <i>H. sapiens</i>  |
| DYRK1A | 52       | TCATTTTCATTCCATGCTGC            | TGG | +      | <i>H. sapiens</i>  |
| DYRK1A | 53       | CATGCAAOCTTCATCTGTT             | CGG | +      | <i>H. sapiens</i>  |
| DYRK1A | 54       | TATTACAGAATGAGAGACTG            | TGG | -      | <i>H. sapiens</i>  |
| DYRK1A | 55       | TTATTTCTGAAGAATATTAA            | AGG | +      | <i>H. sapiens</i>  |
| DYRK1A | 56       | AAAAAGCOCTAAACAAAAGAA           | TGG | -      | <i>H. sapiens</i>  |
| DYRK1A | 57       | TGTGTGAGGATAAAAGAGTT            | GGG | +      | <i>H. sapiens</i>  |
| DYRK1A | 58       | COGGCCAAAGCOCTTGAAGCC           | AGG | -      | <i>H. sapiens</i>  |
| DYRK1A | 59       | CTGGTGTAGGATTTGAGTT             | AGG | +      | <i>H. sapiens</i>  |
| DYRK1A | 60       | TCAGAGCTTCTGACACCCA             | TGG | -      | <i>H. sapiens</i>  |
| DYRK1A | 61       | AATACCTAGTTACAGGCATT            | TGG | +      | <i>H. sapiens</i>  |
| GRIN2B | 62       | GGTGTGATGCTCTTTGGGT             | CGG | -      | <i>H. sapiens</i>  |
| GRIN2B | 63       | TCTGTGATCTCATGTCTGAC            | CGG | +      | <i>H. sapiens</i>  |
| GRIN2B | 64       | CAGCAATGCCAATGCTGGGG            | GGG | -      | <i>H. sapiens</i>  |
| GRIN2B | 65       | CCTCGTGGCCACTTCCGAGG            | AGG | +      | <i>H. sapiens</i>  |
| GRIN2B | 66       | TTTCTCGTGGCATOCTTGA             | TGG | -      | <i>H. sapiens</i>  |
| GRIN2B | 67       | TGATTTCCACCATCTCTCCG            | TGG | +      | <i>H. sapiens</i>  |
| GRIN2B | 68       | GGAGAACAACCACTCCGCTCT           | GGG | -      | <i>H. sapiens</i>  |
| GRIN2B | 69       | CTGGTGTGTTGGCCCTCC              | TGG | +      | <i>H. sapiens</i>  |
| GRIN2B | 70       | CCAACAACAACCAAGACTTG            | GGG | -      | <i>H. sapiens</i>  |
| GRIN2B | 71       | ACAGCAATGCCAATGCTGGG            | GGG | -      | <i>H. sapiens</i>  |
| GRIN2B | 72       | GTGGAATCATCTTTCTGTT             | TGG | -      | <i>H. sapiens</i>  |
| GRIN2B | 73       | TCTGCTGCTGACACGGCCA             | AGG | -      | <i>H. sapiens</i>  |
| GRIN2B | 74       | CGAGCTCTGCTGCTGACAC             | CGG | -      | <i>H. sapiens</i>  |
| GRIN2B | 75       | TOCTTGATGGCCACTCGTC             | CGG | -      | <i>H. sapiens</i>  |
| GRIN2B | 76       | ATGACAGCAATGCCAATGCT            | TGG | -      | <i>H. sapiens</i>  |
| GRIN2B | 77       | AGCAATGCCAATGCTGGGG             | GGG | -      | <i>H. sapiens</i>  |
| GRIN2B | 78       | GCCAACAACAACCAAGACTT            | TGG | -      | <i>H. sapiens</i>  |
| GRIN2B | 79       | TGACAGCAATGCCAATGCTG            | GGG | -      | <i>H. sapiens</i>  |
| GRIN2B | 80       | GAGAACAACCACTCCGCTCTG           | GGG | -      | <i>H. sapiens</i>  |
| GRIN2B | 81       | CTGCTGACACGGCCAGGAC             | CGG | -      | <i>H. sapiens</i>  |
| GRIN2B | 82       | CTGGTAGATGAGTTGGGTT             | TGG | +      | <i>H. sapiens</i>  |
| GRIN2B | 83       | AGTGTGTTCTCCAAAGTTT             | TGG | +      | <i>H. sapiens</i>  |
| GRIN2B | 84       | GGCATTGCTGTATCCTCGT             | GGG | +      | <i>H. sapiens</i>  |
| GRIN2B | 85       | TOCCAAGTTCTGGTTGGTGT            | TGG | +      | <i>H. sapiens</i>  |
| GRIN2B | 86       | TTGGCCGCTGCTGGCCGTGT            | AGG | +      | <i>H. sapiens</i>  |
| GRIN2B | 87       | TTGGCCGCTGCTGGCCGTGT            | AGG | +      | <i>H. sapiens</i>  |
| GRIN2B | 88       | TGGCATTGCTGTATCCTCG             | TGG | +      | <i>H. sapiens</i>  |
| GRIN2B | 89       | CAGAAGAGCCGCCAGCAT              | TGG | +      | <i>H. sapiens</i>  |
| GRIN2B | 90       | CGTGGCCACTTCCGAGG               | TGG | +      | <i>H. sapiens</i>  |
| GRIN2B | 91       | TGACCCGAAAGATCCAGGGG            | TGG | +      | <i>H. sapiens</i>  |
| MeCP2  | 92       | GTCCAACCTTCAAGCAAGGT            | GGG | -      | <i>M. musculus</i> |
| MeCP2  | 93       | AAGCTTAAACAAGGAAGTG             | TGG | +      | <i>M. musculus</i> |
| MeCP2  | 94       | GGCTGTTTGGGGGAGCCG              | AGG | -      | <i>M. musculus</i> |
| MeCP2  | 95       | GGCTOATTATCOGTGACCG             | GGG | +      | <i>M. musculus</i> |
| VEGFA  | 96       | GGTGGGGGAGTTTCTCC               | TGG | -      | <i>H. sapiens</i>  |
| VEGFA  | 97       | TOCTCTTTAGCCAGAGCCG             | GGG | +      | <i>H. sapiens</i>  |
| VEGFA  | 98       | GACCCCTCCACCCCGCTC              | CGG | -      | <i>H. sapiens</i>  |
| VEGFA  | 99       | GAAACTTTTCTGCTCAACTTC           | TGG | +      | <i>H. sapiens</i>  |
