# Supplementary material
Source: PubMed Central journal article supplement (PMC3856256)
Supplement: NIHMS516731-supplement-02.pdf [file NIHMS516731-supplement-02.pdf]

*Supplementary Information*

**Double nicking by RNA-guided CRISPR Cas9 for Enhanced  
Genome Editing Specificity**

F. Ann Ran<sup>1,2,3\*</sup>, Patrick D. Hsu<sup>1,2,3\*</sup>, Chie-Yu Lin<sup>1,2\*</sup>, Jonathan S. Gootenberg<sup>1</sup>, Silvana Konermann<sup>1,2</sup>, Alexandro Trevino<sup>1</sup>, David A. Scott<sup>1,2</sup>, Azusa Inoue<sup>4</sup>, Shogo Matoba<sup>4</sup>, Yi Zhang<sup>4</sup>,  
and Feng Zhang<sup>1,2†</sup>

<sup>1</sup> Broad Institute of MIT and Harvard  
7 Cambridge Center  
Cambridge, MA 02142, USA

<sup>2</sup> McGovern Institute for Brain Research  
Department of Brain and Cognitive Sciences  
Department of Biological Engineering  
Massachusetts Institute of Technology  
Cambridge, MA 02139, USA

<sup>3</sup> Department of Molecular and Cellular Biology  
Harvard University  
Cambridge, MA 02138, USA

<sup>4</sup> Department of Genetics  
Harvard Medical School  
Boston, MA 02115, USA

\* These authors contributed equally to this work.

† To whom correspondence should be addressed: [zhang@broadinstitute.org](mailto:zhang@broadinstitute.org).

## PRIMER SEQUENCES

### SURVEYOR assay

| primer name | genomic target | primer sequence (5' to 3') |
|-------------|----------------|----------------------------|
| SUV901      | <i>EMX1</i>    | CCATCCCCTTCTGTGAATGT       |
| SUV902      | <i>EMX1</i>    | GGAGATTGGAGACACGGAGA       |
| DYRK1A-F    | <i>DYRK1A</i>  | GGAGCTGGTCTGTTGGAGAA       |
| DYRK1A-R    | <i>DYRK1A</i>  | TCCAATCCATAATCCCACGTT      |
| GRIN2B-F    | <i>GRIN2B</i>  | CAGGAGGGCCAGGAGATTTG       |
| GRIN2B-R    | <i>GRIN2B</i>  | TGAAATCGAGGATCTGGGCG       |
| F1          | <i>VEGFA</i>   | CAAAGGACCCAGTCACTCC        |
| R1          | <i>VEGFA</i>   | GAGGAGGGAGCAGGAAAGTG       |
| F2          | <i>VEGFA</i>   | GACACTTCCCAAAGGACCCC       |
| R2          | <i>VEGFA</i>   | TGAGAGCCGTTCCCTCTTTG       |
| F3          | <i>VEGFA</i>   | GACAGGGGCAAAGTGAGTGA       |
| R3          | <i>VEGFA</i>   | TTCATGGTTTCGGAGGCC         |
| F4          | <i>VEGFA</i>   | TGAGTGACCTGCTTTTGGGG       |
| R4          | <i>VEGFA</i>   | GTTTCATGGTTTCGGAGGCC       |

### Next-generation deep sequencing and HR

| primer name | primer sequence (5' to 3')  |
|-------------|-----------------------------|
| EMX1-F      | GGAGGACAAAGTACAAACGGC       |
| EMX1-R      | ATCGATGTCCTCCCCATTGG        |
| EMX1-HR-F   | CCATCCCCTTCTGTGAATGT        |
| EMX1-HR-R   | GGAGATTGGAGACACGGAGA        |
| EMX1-OT1-F  | TGGGAGAGAGACCCCTTCTT        |
| EMX1-OT1-R  | TCCTGCTCTCACTTAGACTTTCTC    |
| EMX1-OT2-F  | GACATTCCTCCTGAGGAAAA        |
| EMX1-OT2-R  | GATAAAATGTATTCCTTCTCACCATTC |

|               |                           |
|---------------|---------------------------|
| EMX1-OT3-F    | CCAGACTCAGTAAAGCCTGGA     |
| EMX1-OT3-R    | TGGCCCCAGTCTCTCTTCTA      |
| EMX1-OT4-F    | CACGGCCTTTGCAAATAGAG      |
| EMX1-OT4-R    | CATGACTTGGCCTTTGTAGGA     |
| EMX1-OT5-F    | TGGGGTTACAGAAAGAATAGGG    |
| EMX1-OT5-R    | TTCTGAGGGCTGCTACCTGT      |
| VEGFA-F       | TGAAGCAACTCCAGTCCCAA      |
| VEGFA-R       | CCCGGCTCTGGCTAAAGAG       |
| VEGFA-OT1.1-F | TGGGTGTGCACATCTAAGGA      |
| VEGFA-OT1.1-R | CCACTGAGTCAACTGTAAGCA     |
| VEGFA-OT2.1-F | GCAGAGGAATATGTGACATGAGG   |
| VEGFA-OT2.1-R | TACTCCCTGCTGTCTCTCC       |
| VEGFA-OT3.1-F | TTCTGGCCAAGTCGATTCC       |
| VEGFA-OT3.1-R | GGATACCAGCATGGGCTACC      |
| VEGFA-OT4.1-F | ACTCTTGAGATTGGAACGGGA     |
| VEGFA-OT4.1-R | CCACACTTATCTACGCCCA       |
| VEGFA-OT5.1-F | AGCCAGAAGAGAACATCCACG     |
| VEGFA-OT5.1-R | AGTTGCTCTTTGTTGAGAGGGA    |
| MECP2-F       | TGACCGGGGACCTATGTATGA     |
| MECP2-R       | ACAAGACTTGCTCTTACTTACTTGA |

#### qRT-PCR for Cas9 and sgRNA expression

| primer name                    | primer sequence (5' to 3') |
|--------------------------------|----------------------------|
| sgRNA reverse-strand synthesis | AAGCACCGACTCGGTGCCAC       |
| EMX1.3 sgRNA qPCR F            | AGTCCGAGCAGAAGAAGAAGTTT    |
| EMX1.3 sgRNA qPCR R            | TTTCAAGTTGATAACGGACTAGCCT  |
| Cas9 qPCR F                    | AAACAGCAGATTCGCCTGGA       |

|              |                      |
|--------------|----------------------|
| Cas9 qPCR R  | TCATCCGCTCGATGAAGCTC |
| GAPDH qPCR F | TCCAAAATCAAGTGGGGCGA |
| GAPDH qPCR R | TGATGACCCTTTTGGCTCCC |

**Multiplex nicking screening primers**

| <b>Deletion size (kb)</b> | <b>Forward primer (5' to 3')</b> | <b>Reverse primer (5' to 3')</b> |
|---------------------------|----------------------------------|----------------------------------|
| 0.5                       | AGGTTGTTGCTGTTGCTTTACA           | AGCACGGTTAATTTGCATACATCT         |
| 1                         | AGGTTGTTGCTGTTGCTTTACA           | TCCAGGCAGTTTTCTTCTGGT            |
| 2                         | AGGTTGTTGCTGTTGCTTTACA           | CCAGAGAGCCAGCATTCCAA             |
| 6                         | AGGTTTCACCTGGTTTGGGG             | AGGGCTCCCACTAGAAGAGG             |

**VEGFA off-target sites**

| <b>sgRNA</b> | <b>Off-target site</b> | <b>Off-target sequence (5' to 3')</b> |
|--------------|------------------------|---------------------------------------|
| 96           | OT-1.1                 | GGATGGAGGGAGTTTGCTCCTGG               |
| 98           | OT-2.1                 | CGCCCTCCCCACCCCGCCTCCGG               |
| 98           | OT-3.1                 | TACCCCCACACCCCGCCTCTGG                |
| 98           | OT-4.1                 | GGGCCCTCCACCCCGCCTCTGG                |
| 98           | OT-5.1                 | CTACCCCTCCACCCCGCCTCCGG               |



AACAGAACTTCATGCAGCTGATCCACGACGACAGCCTGACCTTTAAAGAGGACATCCAGAAAGCCCAGGTGTCCGGC  
CAGGGCGATAGCCTGCACGAGCACATTGCCAATCTGGCCGGCAGCCCCGCCATTAAGAAGGGCATCCTGCAGACAGTG  
AAGGTGGTGGACGAGCTCGTGAAAGTGATGGGCCGGCACAAGCCCGAGAACATCGTGATCGAAATGGCCAGAGAGAAC  
CAGACCACCCAGAAGGGACAGAAGAACAGCCGCGAGAGAATGAAGCGGATCGAAGAGGGCATCAAAGAGCTGGGCAGC  
CAGATCCTGAAAGAACACCCCGTGGAAAACACCCAGCTGCAGAACGAGAAGCTGTACCTGTACTACCTGCAGAATGGG  
CGGGATATGTACGTGGACCAGGAAGTGGACATCAACCGGCTGTCCGACTACGATGTGGACCATATCGTGCCTCAGAGC  
TTTCTGAAGGACGACTCCATCGACAACAAGGTGCTGACCAGAAGCGACAAGAACCGGGGAAGAGCGACAACGTGCC  
TCCGAAGAGGTGCTGAAGAAGATGAAGAAGTACTGGCCGGCAGCTGCTGAACGCCAAGCTGATTACCCAGAGAAAGTTC  
GACAATCTGACCAAGGCCGAGAGAGGCGGCCTGAGCGAAGTGGATAAGGCCGGCTTCATCAAGAGACAGCTGGTGGAA  
ACCCGGCAGATCACAAAGCAGTGGCACAGATCCTGGACTCCCGGATGAACACTAAGTACGACGAGAATGACAAGCTG  
ATCCGGGAAGTGAAGTGATCACCTGAAGTCCAAGCTGGTGTCCGATTTCCGGAAGGATTTCCAGTTTTACAAAGTG  
CGCGAGATCAACAAGTACCACCACGCCACGACGCCTACCTGAACGCCGTGCTGGGAACCGCCCTGATCAAAAAGTAC  
CCTAAGCTGGAAAGCGAGTTCGTGTACGGCGACTACAAGGTGTACGACGTGCGGAAGATGATCGCCAAGAGCGAGCAG  
GAAATCGGCAAGGCTACCGCCAAGTACTTCTTCTACAGCAACATCATGAACTTTTTCAAGACCGAGATTACCCTGGCC  
AACGGCGAGATCCGGAAGCGGCCTCTGATCGAGACAAACGGCGAAACCGGGGAGATCGTGTGGGATAAGGGCCGGGAT  
TTTGCCACCGTGGGAAAGTGCTGAGCATGCCCAAGTGAATATCGTGA AAAAGACCGAGGTGCAGACAGGCGGCTTC  
AGCAAAGAGTCTATCCTGCCAAGAGGAACAGCGATAAGCTGATCGCCAGAAAGAAGGACTGGGACCCTAAGAAGTAC  
GGCGGCTTCGACAGCCCCACCGTGGCCTATTCTGTGCTGGTGGTGGCCAAAGTGGAAAAGGGCAAGTCCAAGAACTG  
AAGAGTGTGAAAGAGCTGCTGGGGATCACCATCATGGAAAGAAGCAGCTTCGAGAAGAATCCCATCGACTTTCTGGAA  
GCCAAGGGCTACAAAGAAGTGA AAAAGGACCTGATCATCAAGCTGCCTAAGTACTCCCTGTTTCGAGCTGGAAAACGGC  
CGGAAGAGAATGCTGGCCTCTGCCGGCAACTGCAGAAGGGAAACGAAGTGGCCCTGCCCTCAAATATGTGAACCTC  
CTGTACCTGGCCAGCCACTATGAGAAGCTGAAGGGCTCCCCGAGGATAATGAGCAGAAACAGCTGTTTGTGGAACAG  
CACAAGCACTACCTGGACGAGATCATCGAGCAGATCAGCGAGTTCCTCAAGAGAGTGATCCTGGCCGACGCTAATCTG  
GACAAAGTGTGTCCGCTACAACAAGCACCAGGATAAGCCCATCAGAGAGCAGGCCGAGAATATCATCCACCTGTTT  
ACCCTGACCAATCTGGGAGCCCCTGCCGCTTCAAGTACTTTGACACCACCATCGACCGGAAGAGGTACACCAGCACC  
AAAGAGGTGCTGGACGCCACCCTGATCCACCAGAGCATCACCGGCTGTACGAGACACGGATCGACCTGTCTCAGCTG  
GGAGGCGACAAGCGTCTGCTGCTACTAAGAAAGCTGGTCAAGCTAAGAAAAGAAA

> 3xFLAG-NLS-SpCas9n-NLS (the D10A nickase mutation is labeled in red)

ATGGACTATAAGGACCACGACGGAGACTACAAGGATCATGATATTGATTACAAAGACGATGACGATAAGATGGCCCCA  
AAGAAGAAGCGGAAGGTGGTATCCACGGAGTCCCAGCAGCCGACAAGAAGTACAGCATCGGCCTGGCCATCGGCACC  
AACTCTGTGGGCTGGGCCGTGATCACCGACGAGTACAAGGTGCCAGCAAGAAATCAAGGTGCTGGGCAACACCGAC  
CGGCACAGCATCAAGAAGAACCTGATCGGAGCCCTGCTGTTTCGACAGCGGCGAAACAGCCGAGGCCACCCGGCTGAAG  
AGAACCGCCAGAAGAAGATACACCAGACGGAAGAACCGGATCTGCTATCTGCAAGAGATCTTCAGCAACGAGATGGCC  
AAGGTGGACGACAGCTTCTTCCACAGACTGGAAGAGTCTTCTGGTGGAAAGAGGATAAGAAGCAGGAGCGGCACCCC  
ATCTTCGGCAACATCGTGGACGAGGTGGCCTACCACGAGAAGTACCCACCATCTACCACCTGAGAAAGAACTGGTG  
GACAGCACCGACAAGGCCGACCTGCGGCTGATCTATCTGGCCCTGGCCACATGATCAAGTTCGGGGGCCACTTCTG  
ATCGAGGGCGACCTGAACCCCGACAACAGCGACGTGGACAAGCTGTTTCATCCAGCTGGTGCAGACCTACAACCAGCTG  
TTCGAGGAAAACCCCATCAACGCCAGCGGCTGGACGCCAAGGCCATCCTGTCTGCCAGACTGAGCAAGAGCAGACGG  
CTGGA AATCTGATCGCCAGCTGCCCGCGAGAAGAAGAATGGCCTGTTCCGCAACCTGATTGCCCTGAGCCTGGG

CTGACCCCCAACTTCAAGAGCAACTTCGACCTGGCCGAGGATGCCAACTGCAGCTGAGCAAGGACACCTACGACGAC  
GACCTGGACAACCTGCTGGCCAGATCGGCGACCAGTACGCCGACCTGTTTCTGGCCGCAAGAACCTGTCCGACGCC  
ATCCTGCTGAGCGACATCCTGAGAGTGAACACCGAGATCACCAAGGCCCCCTGAGCGCCTCTATGATCAAGAGATAC  
GACGAGCACCACCAGGACCTGACCCTGCTGAAAGCTCTCGTGCGGCAGCAGCTGCCTGAGAAGTACAAAGAGATTTTC  
TTCGACCAGAGCAAGAACGGCTACGCCGGCTACATTGACGGCGGAGCCAGCCAGGAAGAGTTCTACAAGTTCATCAAG  
CCCATCCTGGAAAAGATGGACGGCACCGAGGAACTGCTCGTGAAGCTGAACAGAGAGGACCTGCTGCGGAAGCAGCGG  
ACCTTCGACAACGGCAGCATCCCCACCAGATCCACCTGGGAGAGCTGCACGCCATTCTGCGGCGGCAGGAAGATTTT  
TACCCATTCTGAAGGACAACCGGGAAAAGATCGAGAAGATCCTGACCTTCGCATCCCCTACTACGTGGGCCCTCTG  
GCCAGGGGAAAACAGCAGATTCGCCTGGATGACCAGAAAAGAGCGAGGAAACCATCACCCCTGGAACCTCGAGGAAGTG  
GTGGACAAGGGCGCTTCGCGCCAGAGCTTCATCGAGCGGATGACCAACTTCGATAAGAACCTGCCAACGAGAAGGTG  
CTGCCAACGACAGCCTGCTGTACGAGTACTTCACCGTGTATAACGAGCTGACCAAAGTAAAATACGTGACCGAGGGA  
ATGAGAAAGCCCGCCTTCTGAGCGGCGAGCAGAAAAAGGCCATCGTGGACCTGCTGTTCAAGACCAACCGGAAAGTG  
ACCGTGAAGCAGCTGAAAGAGGACTACTTCAAGAAAATCGAGTGTTCGACTCCGTGGAATCTCCGGCGTGAAGAT  
CGGTTCAACGCCTCCCTGGGCACATACCAGATCTGCTGAAAATTATCAAGGACAAGGACTTCTGGACAATGAGGAA  
AACGAGGACATTCTGGAAGATATCGTGTGACCCTGACACTGTTTGAGGACAGAGAGATGATCGAGGAACGGCTGAAA  
ACCTATGCCACCTGTTTCGACGACAAAAGTATGAAGCAGCTGAAGCGGCGGAGATACACCGGCTGGGGCAGGCTGAGC  
CGGAAGCTGATCAACGGCATCCGGGACAAGCAGTCCGGCAAGACAATCCTGGATTTCTGAAGTCCGACGGCTTCGCC  
AACAGAACTTCATGCAGCTGATCCACGACGACAGCCTGACCTTTAAGAGGACATCCAGAAAGCCAGGTGTCCGGC  
CAGGGCGATAGCCTGCACGAGCACATTGCCAATCTGGCCGGCAGCCCCGCCATTAAGAAGGGCATCCTGCAGACAGTG  
AAGGTGGTGGACGAGCTCGTGAAGTGTGAGGCGGCGACAAGCCGAGAACATCGTGTGAAATGGCCAGAGAGAAC  
CAGACCACCCAGAAGGGACAGAAGAACAGCCGCGAGAGAATGAAGCGGATCGAAGAGGGCATCAAAGAGCTGGGCAGC  
CAGATCCTGAAAGAACACCCCGTGGAAAACACCCAGCTGCAGAACGAGAAGCTGTACCTGTACTACCTGCAGAATGGG  
CGGGATATGTACGTGGACCAGGAACTGGACATCAACCGGCTGTCCGACTACGATGTGGACCATATCGTGCCTCAGAGC  
TTTCTGAAGGACGACTCCATCGACAACAAGGTGCTGACCAGAAGCGACAAGAACCGGGGCAAGAGCGACAACGTGCC  
TCCGAAGAGGTGCTGAAGAAGATGAAGAATACTGGCGGCGAGCTGCTGAACGCCAAGCTGATTACCCAGAGAAAGTTC  
GACAATCTGACCAAGGCCGAGAGAGGGCGCCTGAGCGAACTGGATAAGGCCGGCTTCATCAAGAGACAGCTGGTGGAA  
ACCCGGCAGATCACAAAGCACGTGGCACAGATCCTGGACTCCCGGATGAACACTAAGTACGACGAGAATGACAAGCTG  
ATCCGGGAAGTGAAGTGTACCCCTGAAGTCCAAGCTGGTGTCCGATTTCCGGAAGGATTTCCAGTTTTACAAAGTG  
CGCGAGATCAACAATAACCACGCCCACGACGCCTACCTGAACGCCGTGCTGGGAACCGCCCTGATCAAAAAGTAC  
CCTAAGCTGGAAAGCGAGTTCGTGTACGGCGACTACAAGGTGTACGACGTGCGGAAGATGATCGCCAAGAGCGAGCAG  
GAAATCGGCAAGGCTACCGCCAAGTACTTCTTCTACAGCAACATCATGAACTTTTTCAAGACCGAGATTACCCTGGCC  
AACGGCGAGATCCGGAAGCGGCCTCTGATCGAGACAAACGGCGAAACCGGGGAGATCGTGTGGGATAAGGGCCGGGAT  
TTTGCCACCGTGCAGAAAGTGTGAGCATGCCCAAGTGAATATCGTGA AAAAGACCGAGGTGCAGACAGGCGGCTTC  
AGCAAAGAGTCTATCCTGCCAAGAGGAACAGCGATAAGCTGATCGCCAGAAAAGAGGACTGGGACCCTAAGAAGTAC  
GGCGGCTTCGACAGCCCCACCGTGGCCTATTCTGTGCTGGTGGTGGCCAAAGTGGAAAAGGGCAAGTCCAAGAACTG  
AAGAGTGTGAAAGAGCTGCTGGGGATCACCATCATGGAAAGAAGCAGCTTCGAGAAGAATCCCATCGACTTTCTGGAA  
GCCAAGGGCTACAAAGAAGTAAAAAGGACCTGATCATCAAGCTGCCTAAGTACTCCCTGTTTCGAGCTGGAAAACGGC  
CGGAAGAGAATGCTGGCCTCTGCCGGGCAACTGCAGAAGGGAAACGAACTGGCCCTGCCCTCCAAATATGTGAACTTC  
CTGTACCTGGCCAGCCACTATGAGAAGCTGAAGGGCTCCCCGAGGATAATGAGCAGAAACAGCTGTTTGTGGAACAG  
CACAAGCACTACCTGGACGAGATCATCGAGCAGATCAGCGAGTTCCTCAAGAGAGTGTATCCTGGCCGACGCTAATCTG  
GACAAAGTGTGTCCGCTACAACAAGCACCGGGATAAGCCCATCAGAGAGCAGGCGGAGAATATCATCCACCTGTTT



ACCCTGACCAATCTGGGAGCCCCTGCCGCCTTCAAGTACTTTGACACCACCATCGACCGGAAGAGGTACACCAGCACC  
AAAGAGGTGCTGGACGCCACCCTGATCCACCAGAGCATCACCGGCCTGTACGAGACACGGATCGACCTGTCTCAGCTG  
GGAGGCGACAAGCGTCCTGCTGCTACTAAGAAAGCTGGTCAAGCTAAGAAAAAGAAA

> dsODN ligation insert fwd

AGCAGGCCAATGGGGAGGACATCGATGTCACCTCCAATGACTAcTACCCATACGATGTTCCAGATTACGCTATGGACT  
ATAAGGACCACGACGGAGACTACAAGGATCATGATATTGATTACAAAGACGATGACGATAAGaagcttgaaATGGCAT  
CAATGCAGAAGCTGATCTCAGAGGAGGACCTGtaa

> dsODN ligation insert rev

TAGTCATTGGAGGTGACATCGATGTCCTCCCCATTGGCCTGCTTTACAGGTCCTCCTCTGAGATCAGCTTCTGCATTG  
ATGCCATTTCAAGCTTCTTATCGTCATCGTCTTTGTAATCAATATCATGATCCTTGTAGTCTCCGTCGTGGTCCTTAT  
AGTCCATAGCGTAATCTGGAACATCGTATGGGTAG

The RNA-guided Cas9 nuclease can tolerate certain mismatches to the DNA target and thereby promote undesired off-target mutagenesis. Cas9 nickase mutants can be combined with guide RNA pairs to introduce targeted double-strand breaks. Paired nicking reduces off-target activity by 50-1,000 fold in cell lines and facilitates gene knockout in mouse zygotes without sacrificing on-target cleavage efficiency. This versatile strategy enables a wide variety of genome editing applications with higher levels of specificity.
